# Supplementary material for: Identification of Morphogenesis-Related NDR Kinase Signaling Network and Its Regulation on Cold Tolerance in Maize
Source: MDPI journal article supplement (doi:10.3390/plants12203639), 2023-10-21
Supplement: s1 [file s1]

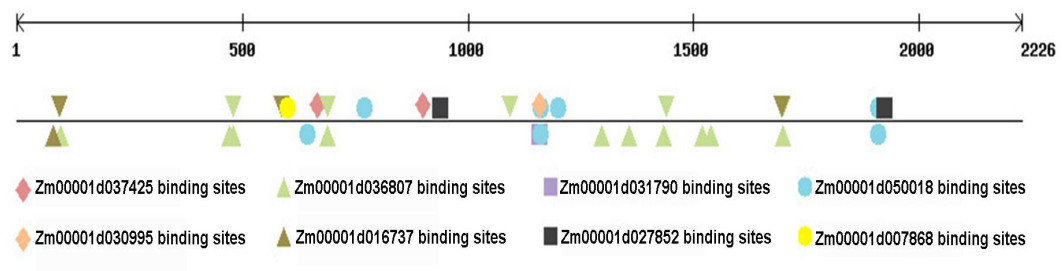

Figure S2 Promoter analysis of *Zm00001d010720*. In the promoter region of *Zm00001d010720*, binding sites of 8 transcription factors, including bZIP68, are found.
