# Supplementary material for: Identification of Morphogenesis-Related NDR Kinase Signaling Network and Its Regulation on Cold Tolerance in Maize
Source: Plants (Basel). 2023 Oct 21;12(20):3639. doi: 10.3390/plants12203639 (PMC10610150; doi:10.3390/plants12203639)
Supplement: Supplementary file 1 [file plants-12-03639-s001.zip › Supplementary Table S1.xlsx]

## Sheet: Table S1
Table S1 List of 19 MOR signaling network genes in maize.
Gene name	Gene ID
KIC1	Zm00001d034055
TAO3/FRY	Zm00001d051839
MO25	Zm00001d027862
MO25	Zm00001d006710
MO25	Zm00001d021954
MO25	Zm00001d007058
MOB	Zm00001d049496
MOB	Zm00001d024510
MOB	Zm00001d029476
MOB	Zm00001d029478
MOB	Zm00001d051630
MOB	Zm00001d014235
CBK1/NDR	Zm00001d032716
CBK1/NDR	Zm00001d039526
CBK1/NDR	Zm00001d008791
CBK1/NDR	Zm00001d009940
CBK1/NDR	Zm00001d031040
CBK1/NDR	Zm00001d038672
CBK1/NDR	Zm00001d010720
