# Supplementary material for: Identification of Morphogenesis-Related NDR Kinase Signaling Network and Its Regulation on Cold Tolerance in Maize
Source: Plants (Basel). 2023 Oct 21;12(20):3639. doi: 10.3390/plants12203639 (PMC10610150; doi:10.3390/plants12203639)
Supplement: Supplementary file 1 [file plants-12-03639-s001.zip › Supplementary Table S2.xlsx]

## Sheet: Table S2
Table S2 Co-expression analysis of 19 maize MOR signaling network genes.
	Zm00001d034055	Zm00001d051839	Zm00001d027862	Zm00001d006710	Zm00001d021954	Zm00001d007058	Zm00001d049496	Zm00001d024510	Zm00001d029476	Zm00001d029478	Zm00001d051630	Zm00001d014235	Zm00001d032716	Zm00001d039526	Zm00001d008791	Zm00001d009940	Zm00001d031040	Zm00001d038672	Zm00001d010720
Zm00001d034055	1	.689**	-0.179652	.758**	.890**	.831**	.518**	.726**	-0.393483	-0.137448	-0.334327	-0.20352	0.246321	.744**	.878**	.763**	.908**	.513*	.795**
Zm00001d051839	.689**	1	-0.159782	.572**	.614**	.648**	0.28049	0.254634	-0.276252	-0.100829	-.412*	0.333512	-0.16189	.434*	.529**	0.300687	.637**	0.231444	.607**
Zm00001d027862	-0.179652	-0.159782	1	-0.220432	-0.230786	-0.134868	-0.104867	-0.0847128	-0.0224847	-0.0766318	-0.0969572	-0.172291	-0.0875936	-0.175323	-0.157493	-0.0868723	-0.219029	0.10748	-0.159184
Zm00001d006710	.758**	.572**	-0.220432	1	.945**	.907**	.650**	.711**	0.034064	-0.138457	-0.222237	-0.0343075	0.130169	.610**	.641**	.472*	.758**	.646**	.885**
Zm00001d021954	.890**	.614**	-0.230786	.945**	1	.890**	.681**	.765**	-0.144784	-0.17005	-0.284747	-0.171746	0.274568	.748**	.802**	.647**	.872**	.618**	.870**
Zm00001d007058	.831**	.648**	-0.134868	.907**	.890**	1	.636**	.760**	-0.107612	-0.101103	-0.239326	-0.128431	0.0671891	.647**	.748**	.459*	.848**	.514*	.868**
Zm00001d049496	.518**	0.28049	-0.104867	.650**	.681**	.636**	1	.827**	-0.260892	0.389718	-0.222862	-0.1807	.569**	.867**	.706**	0.286363	.743**	0.300457	.646**
Zm00001d024510	.726**	0.254634	-0.0847128	.711**	.765**	.760**	.827**	1	-0.309375	0.296032	-0.174218	-0.398805	.494*	.840**	.798**	.588**	.825**	.450*	.728**
Zm00001d029476	-0.393483	-0.276252	-0.0224847	0.034064	-0.144784	-0.107612	-0.260892	-0.309375	1	-0.333815	0.269509	0.366706	-0.232156	-.536**	-.438*	-.423*	-0.388579	-0.00662052	-0.2469
Zm00001d029478	-0.137448	-0.100829	-0.0766318	-0.138457	-0.17005	-0.101103	0.389718	0.296032	-0.333815	1	0.0199048	0.122786	0.256141	0.328407	0.0847537	-0.167301	0.0910496	-0.35142	-0.0531292
Zm00001d051630	-0.334327	-.412*	-0.0969572	-0.222237	-0.284747	-0.239326	-0.222862	-0.174218	0.269509	0.0199048	1	0.0888849	-0.195335	-0.38881	-0.375119	-0.234181	-0.363285	-0.152782	-0.307255
Zm00001d014235	-0.20352	0.333512	-0.172291	-0.0343075	-0.171746	-0.128431	-0.1807	-0.398805	0.366706	0.122786	0.0888849	1	-0.264216	-0.347157	-0.357566	-.415*	-0.245188	-0.233475	-0.185223
Zm00001d032716	0.246321	-0.16189	-0.0875936	0.130169	0.274568	0.0671891	.569**	.494*	-0.232156	0.256141	-0.195335	-0.264216	1	.526**	0.376514	.461*	0.322701	0.0804923	0.0302453
Zm00001d039526	.744**	.434*	-0.175323	.610**	.748**	.647**	.867**	.840**	-.536**	0.328407	-0.38881	-0.347157	.526**	1	.909**	.539**	.909**	0.306381	.724**
Zm00001d008791	.878**	.529**	-0.157493	.641**	.802**	.748**	.706**	.798**	-.438*	0.0847537	-0.375119	-0.357566	0.376514	.909**	1	.579**	.967**	0.302987	.763**
Zm00001d009940	.763**	0.300687	-0.0868723	.472*	.647**	.459*	0.286363	.588**	-.423*	-0.167301	-0.234181	-.415*	.461*	.539**	.579**	1	.576**	.635**	.473*
Zm00001d031040	.908**	.637**	-0.219029	.758**	.872**	.848**	.743**	.825**	-0.388579	0.0910496	-0.363285	-0.245188	0.322701	.909**	.967**	.576**	1	0.379736	.844**
Zm00001d038672	.513*	0.231444	0.10748	.646**	.618**	.514*	0.300457	.450*	-0.00662052	-0.35142	-0.152782	-0.233475	0.0804923	0.306381	0.302987	.635**	0.379736	1	.661**
Zm00001d010720	.795**	.607**	-0.159184	.885**	.870**	.868**	.646**	.728**	-0.2469	-0.0531292	-0.307255	-0.185223	0.0302453	.724**	.763**	.473*	.844**	.661**	1
* significant at p < 0.05 by the Student’s t test.
** significant at p < 0.01 by the Student’s t test.
