# Supplementary material for: Identification of Morphogenesis-Related NDR Kinase Signaling Network and Its Regulation on Cold Tolerance in Maize
Source: Plants (Basel). 2023 Oct 21;12(20):3639. doi: 10.3390/plants12203639 (PMC10610150; doi:10.3390/plants12203639)
Supplement: Supplementary file 1 [file plants-12-03639-s001.zip › Supplementary Table S3.xlsx]

## Sheet: Table S3
Table S3 Co-expression analysis of MOR signaling network genes and cold tolerance-related genes.
	Zm00001d007382	Zm00001d009795	Zm00001d014658	Zm00001d015743	Zm00001d024807	Zm00001d026239	Zm00001d034553	Zm00001d034770	Zm00001d046402	Zm00001d049294	Zm00001d050018	Zm00001d042263
Zm00001d034055	.496*	0.37183	.542**	-.611**	.684**	.916**	.799**	0.357969	-.548**	.581**	.683**	.594**
Zm00001d051839	.649**	.528**	0.317822	-.696**	0.304349	.630**	.813**	.749**	-.646**	.609**	.668**	.624**
Zm00001d006710	.751**	.499*	0.344873	-0.381605	.547**	.712**	.871**	.617**	-.408*	.820**	.575**	.553**
Zm00001d021954	.636**	.453*	.472*	-.497*	.661**	.839**	.860**	.474*	-.483*	.722**	.659**	.533**
Zm00001d007058	.825**	.436*	0.384496	-.440*	.670**	.788**	.846**	.586**	-0.399707	.904**	.641**	.699**
Zm00001d049496	.519**	.554**	.462*	-.438*	.622**	.723**	0.390265	0.34124	-.407*	.549**	.557**	0.201567
Zm00001d024510	.442*	.458*	.602**	-.440*	.699**	.829**	.462*	0.174347	-0.392916	.538**	.533**	0.308755
Zm00001d039526	0.347657	.616**	.548**	-.650**	.635**	.862**	.483*	0.21463	-.599**	.407*	.634**	0.212796
Zm00001d008791	.412*	.413*	.450*	-.574**	.711**	.907**	.564**	0.21134	-.523**	.509*	.629**	.472*
Zm00001d009940	0.0274546	0.124711	.724**	-.430*	.553**	.690**	.514*	-0.0890892	-0.358376	0.131661	.522**	0.254895
Zm00001d031040	.562**	.544**	.478*	-.641**	.687**	.941**	.696**	0.397234	-.605**	.636**	.718**	.511*
Zm00001d010720	.615**	.611**	0.374085	-.456*	.567**	.755**	.803**	.508*	-.440*	.699**	.700**	.513*
* significant at p < 0.05 by the Student’s t test.
** significant at p < 0.01 by the Student’s t test.
