# Supplementary material for: Identification of Morphogenesis-Related NDR Kinase Signaling Network and Its Regulation on Cold Tolerance in Maize
Source: Plants (Basel). 2023 Oct 21;12(20):3639. doi: 10.3390/plants12203639 (PMC10610150; doi:10.3390/plants12203639)
Supplement: Supplementary file 1 [file plants-12-03639-s001.zip › Supplementary Table S4.xlsx]

## Sheet: Table S4
Table S4 Upstream transcription factors analysis of Zm00001d010720.
IDa	TF family	Pearson’s correlation coefficientb	B73_controlc	B73_coldc	fold change(cold/control)
Zm00001d029607	GRAS	0.624048	1.3	0.2	0.153846
Zm00001d006293	Nin-like	0.612686	5.4	0.9	0.166667
Zm00001d032206	MYB	0.621692	4.3	0.8	0.186047
Zm00001d027852	HD-ZIP	0.622567	8.5	2	0.235294
Zm00001d053178	Trihelix	0.675881	0.4	0.1	0.25
Zm00001d012719	bZIP	0.605604	5	1.3	0.26
Zm00001d018119	bHLH	0.627768	2.9	0.8	0.275862
Zm00001d010758	HB-other	0.732653	3.3	1	0.30303
Zm00001d007382	bHLH	0.615132	1.3	0.4	0.307692
Zm00001d031790	bZIP	0.638493	5.3	1.7	0.320755
Zm00001d046441	FAR1	0.650485	3.1	1	0.322581
Zm00001d050018	bZIP	0.700323	3.4	1.1	0.323529
Zm00001d021799	FAR1	0.684192	2.7	0.9	0.333333
Zm00001d022142	FAR1	0.62806	3	1.1	0.366667
Zm00001d048309	bHLH	0.784603	0.8	0.3	0.375
Zm00001d011745	B3	0.833951	2.1	0.8	0.380952
Zm00001d049493	FAR1	0.704974	1	0.4	0.4
Zm00001d049824	SBP	0.617427	0.5	0.2	0.4
Zm00001d048734	HB-other	0.729079	4.5	1.9	0.422222
Zm00001d027677	C2H2	0.706036	0.9	0.4	0.444444
Zm00001d036807	bHLH	0.763917	3.6	1.6	0.444444
Zm00001d036551	MYB	0.761391	2.9	1.3	0.448276
Zm00001d038546	G2-like	0.604856	9.6	4.4	0.458333
Zm00001d021424	NAC	0.79666	1.3	0.6	0.461538
Zm00001d006835	NF-YA	0.616098	4.7	2.2	0.468085
Zm00001d038087	AP2	0.731815	9	4.3	0.477778
Zm00001d007384	E2F/DP	0.78836	0.2	0.1	0.5
Zm00001d018656	WRKY	0.647968	0.2	0.1	0.5
Zm00001d021423	NAC	0.829819	1.2	0.6	0.5
Zm00001d027870	ERF	0.624018	0.2	0.1	0.5
Zm00001d037737	MIKC	0.646495	0.2	0.1	0.5
Zm00001d037786	Nin-like	0.645757	0.2	0.1	0.5
Zm00001d044259	HSF	0.65103	0.2	0.1	0.5
Zm00001d044463	LSD	0.653928	0.8	0.4	0.5
Zm00001d052288	E2F/DP	0.688274	1.2	0.6	0.5
Zm00001d037836	MYB-related	0.782567	4.3	2.2	0.511628
Zm00001d002790	GATA	0.725994	3.6	1.9	0.527778
Zm00001d042212	HB-other	0.777912	5.3	2.8	0.528302
Zm00001d020046	HB-other	0.641423	8.5	4.5	0.529412
Zm00001d021617	FAR1	0.69078	2.8	1.5	0.535714
Zm00001d041497	ARF	0.624971	5.6	3	0.535714
Zm00001d002661	Nin-like	0.655336	4.1	2.2	0.536585
Zm00001d014938	Trihelix	0.720192	2.4	1.3	0.541667
Zm00001d043420	bZIP	0.61761	6.8	3.7	0.544118
Zm00001d050669	bZIP	0.619718	1.8	1	0.555556
Zm00001d050242	NF-YB	0.610776	5.7	3.2	0.561404
Zm00001d002945	NAC	0.613593	23.7	13.5	0.56962
Zm00001d033553	C3H Zinc finger	0.609685	1.9	1.1	0.578947
Zm00001d032681	HD-ZIP	0.674157	5.2	3.1	0.596154
Zm00001d010638	bZIP	0.801219	3	1.8	0.6
Zm00001d018465	G2-like	0.616476	0.5	0.3	0.6
Zm00001d050023	WRKY	0.753717	5.5	3.3	0.6
Zm00001d020019	G2-like	0.677236	4.8	2.9	0.604167
Zm00001d049294	bHLH	0.698876	5.1	3.1	0.607843
Zm00001d052192	bHLH	0.674371	2.3	1.4	0.608696
Zm00001d031572	BBR-BPC	0.63543	6.4	3.9	0.609375
Zm00001d005323	C2H2	0.843841	9.6	6	0.625
Zm00001d039002	HB-other	0.775362	6.2	3.9	0.629032
Zm00001d046223	TALE	0.816826	2.7	1.7	0.62963
Zm00001d018829	YABBY	0.720273	15.4	9.7	0.62987
Zm00001d034282	FAR1	0.626404	4.4	2.8	0.636364
Zm00001d043452	HB-PHD	0.752684	7.7	4.9	0.636364
Zm00001d006127	bZIP	0.706365	6.1	3.9	0.639344
Zm00001d023788	C2H2	0.778475	2.5	1.6	0.64
Zm00001d045735	CO-like	0.714253	7.5	4.8	0.64
Zm00001d046759	bHLH	0.707059	3.1	2	0.645161
Zm00001d044330	MYB-related	0.663188	5.6	3.7	0.660714
Zm00001d006702	WRKY	0.792597	7.4	4.9	0.662162
Zm00001d034965	B3	0.736937	10.4	6.9	0.663462
Zm00001d012688	CPP	0.608797	1.5	1	0.666667
Zm00001d048412	E2F/DP	0.749764	2.1	1.4	0.666667
Zm00001d025727	bHLH	0.603725	0.3	0.2	0.666667
Zm00001d026485	FAR1	0.83353	6.6	4.4	0.666667
Zm00001d042960	AT-Hook	0.812422	2.4	1.6	0.666667
Zm00001d050404	G2-like	0.723552	9.7	6.5	0.670103
Zm00001d018380	ARR-B	0.74374	8.9	6	0.674157
Zm00001d028265	ARR-B	0.721612	6.8	4.6	0.676471
Zm00001d007436	NF-YC	0.809343	7.8	5.3	0.679487
Zm00001d046305	BES1	0.600848	6.6	4.5	0.681818
Zm00001d041923	FAR1	0.706157	3.5	2.4	0.685714
Zm00001d019756	BES1	0.613882	1.6	1.1	0.6875
Zm00001d010309	SBP	0.612622	9.4	6.5	0.691489
Zm00001d017164	FAR1	0.71893	2.6	1.8	0.692308
Zm00001d043922	ARF	0.682415	8.8	6.1	0.693182
Zm00001d022442	bZIP	0.66657	4.9	3.4	0.693878
Zm00001d017507	MYB-related	0.913413	1	0.7	0.7
Zm00001d044260	C3H Zinc finger	0.670424	1	0.7	0.7
Zm00001d042965	C3H Zinc finger	0.605586	11	7.7	0.7
Zm00001d051838	C3H Zinc finger	0.737378	7	4.9	0.7
Zm00001d011560	HB-other	0.677046	3.8	2.7	0.710526
Zm00001d018225	HD-ZIP	0.646786	3.5	2.5	0.714286
Zm00001d042910	MYB	0.74748	7	5	0.714286
Zm00001d033945	GATA	0.609841	5.3	3.8	0.716981
Zm00001d003822	S1Fa-like	0.656033	15.6	11.2	0.717949
Zm00001d020242	C3H Zinc finger	0.71127	3.9	2.8	0.717949
Zm00001d014378	C3H Zinc finger	0.655441	3.2	2.3	0.71875
Zm00001d031061	HD-ZIP	0.611101	3.3	2.4	0.727273
Zm00001d024041	bZIP	0.871791	9.5	7	0.736842
Zm00001d051861	AT-Hook	0.653508	7.7	5.7	0.74026
Zm00001d015118	bZIP	0.600356	5.4	4	0.740741
Zm00001d008648	NF-X1	0.654818	5.1	3.8	0.745098
Zm00001d039266	Nin-like	0.632886	8.3	6.2	0.746988
Zm00001d012751	HB-other	0.837207	10.3	7.7	0.747573
Zm00001d010842	C2H2	0.657453	6.5	4.9	0.753846
Zm00001d017165	FAR1	0.689644	2.9	2.2	0.758621
Zm00001d043696	MYB-related	0.613637	8.5	6.5	0.764706
Zm00001d024321	B3	0.666977	1.7	1.3	0.764706
Zm00001d039467	C2H2	0.603433	2.2	1.7	0.772727
Zm00001d028372	bZIP	0.779405	10.2	7.9	0.77451
Zm00001d005100	Dof	0.735179	11.1	8.6	0.774775
Zm00001d018930	CPP	0.753905	1.8	1.4	0.777778
Zm00001d036494	GATA	0.690697	16	12.5	0.78125
Zm00001d005244	bZIP	0.731759	5.1	4	0.784314
Zm00001d052621	NF-YC	0.805691	15.9	12.5	0.786164
Zm00001d027859	bHLH	0.686265	3.3	2.6	0.787879
Zm00001d044261	C2H2	0.670278	11.2	8.9	0.794643
Zm00001d017788	Dof	0.638729	1.5	1.2	0.8
Zm00001d026305	NF-YA	0.665583	2.5	2	0.8
Zm00001d047960	MYB-related	0.733968	6.6	5.3	0.80303
Zm00001d030518	CAMTA	0.718104	6.1	4.9	0.803279
Zm00001d031009	CPP	0.634058	2.6	2.1	0.807692
Zm00001d011139	C2H2	0.626687	31.4	25.4	0.808917
Zm00001d031064	ARF	0.607007	4.2	3.4	0.809524
Zm00001d040302	C3H Zinc finger	0.627215	6.9	5.6	0.811594
Zm00001d049495	MYB-related	0.64461	11.9	9.7	0.815126
Zm00001d039306	MYB	0.622122	1.1	0.9	0.818182
Zm00001d034033	MYB-related	0.758516	13.3	10.9	0.819549
Zm00001d039750	MYB-related	0.622299	4.6	3.8	0.826087
Zm00001d050781	ARF	0.7891	4.6	3.8	0.826087
Zm00001d021545	FAR1	0.616718	1.2	1	0.833333
Zm00001d053841	C3H Zinc finger	0.77457	12	10	0.833333
Zm00001d034457	bZIP	0.627077	5.5	4.6	0.836364
Zm00001d027752	STAT	0.686076	4.3	3.6	0.837209
Zm00001d002654	C2H2	0.681192	15.2	12.8	0.842105
Zm00001d038397	NF-YB	0.707505	5.8	4.9	0.844828
Zm00001d048059	NAC	0.651429	6.9	5.9	0.855072
Zm00001d019166	bZIP	0.680403	5.6	4.8	0.857143
Zm00001d032328	NF-YB	0.676577	5	4.3	0.86
Zm00001d007675	HB-other	0.746136	5.9	5.1	0.864407
Zm00001d021516	CAMTA	0.697327	5.2	4.5	0.865385
Zm00001d037461	CPP	0.682967	1.7	1.5	0.882353
Zm00001d008322	C3H Zinc finger	0.820534	6	5.3	0.883333
Zm00001d024894	MYB-related	0.691788	0.9	0.8	0.888889
Zm00001d015747	MYB-related	0.770926	5.5	5	0.909091
Zm00001d017595	C3H Zinc finger	0.683455	8.4	7.7	0.916667
Zm00001d018515	AT-Hook	0.608555	3.6	3.3	0.916667
Zm00001d041142	bZIP	0.872379	12.3	11.3	0.918699
Zm00001d033472	TBP	0.730394	4	3.7	0.925
Zm00001d003958	CAMTA	0.657093	6.7	6.2	0.925373
Zm00001d034503	bHLH	0.717268	5.5	5.1	0.927273
Zm00001d053975	BES1	0.626693	3.3	3.1	0.939394
Zm00001d039371	TCP	0.73796	10.2	9.6	0.941176
Zm00001d050698	Trihelix	0.795015	1.7	1.6	0.941176
Zm00001d016836	C3H Zinc finger	0.710775	3.5	3.3	0.942857
Zm00001d050551	C2H2	0.808091	17	16.1	0.947059
Zm00001d016755	Trihelix	0.622335	1.9	1.8	0.947368
Zm00001d016772	FAR1	0.756231	2.3	2.2	0.956522
Zm00001d012337	MYB	0.646799	11	10.6	0.963636
Zm00001d021362	GRF	0.618829	6	5.8	0.966667
Zm00001d016838	ARF	0.776887	16.5	16.1	0.975758
Zm00001d035514	C2H2	0.681497	8.2	8.1	0.987805
Zm00001d003331	WRKY	0.777055	0.1	0.1	1
Zm00001d006922	MYB	0.739492	4.3	4.3	1
Zm00001d010967	MYB-related	0.72998	10.2	10.2	1
Zm00001d015815	GRAS	0.662318	0.1	0.1	1
Zm00001d015990	CPP	0.629258	0.8	0.8	1
Zm00001d028178	NAC	0.653726	0.3	0.3	1
Zm00001d030911	G2-like	0.688892	0.1	0.1	1
Zm00001d033310	G2-like	0.653806	0.4	0.4	1
Zm00001d036692	SBP	0.695973	0.1	0.1	1
Zm00001d038664	E2F/DP	0.698612	0.1	0.1	1
Zm00001d040090	HD-ZIP	0.646375	15.9	15.9	1
Zm00001d042196	NF-YB	0.615213	0.1	0.1	1
Zm00001d052396	ZF-HD	0.730896	0.2	0.2	1
Zm00001d054080	Trihelix	0.631226	5	5	1
Zm00001d031487	SBP	0.655024	20.5	20.7	1.00976
Zm00001d042287	MYB	0.737349	7.5	7.8	1.04
Zm00001d039267	ARF	0.719723	3.2	3.4	1.0625
Zm00001d048404	C2H2	0.622721	3.5	3.8	1.08571
Zm00001d018360	C3H Zinc finger	0.698916	5.8	6.3	1.08621
Zm00001d038704	VOZ	0.662716	6.6	7.2	1.09091
Zm00001d006578	bHLH	0.691817	13.6	14.9	1.09559
Zm00001d018050	AP2	0.744545	7.6	8.4	1.10526
Zm00001d003836	Trihelix	0.651874	3.6	4	1.11111
Zm00001d053819	ARF	0.737498	2.5	2.8	1.12
Zm00001d041445	CPP	0.640449	25	28	1.12
Zm00001d013265	MYB-related	0.639171	6.5	7.3	1.12308
Zm00001d021947	WRKY	0.618727	6.5	7.3	1.12308
Zm00001d021790	B3	0.626145	6.8	7.7	1.13235
Zm00001d027317	HD-ZIP	0.62819	14.2	16.2	1.14085
Zm00001d014132	E2F/DP	0.737032	0.7	0.8	1.14286
Zm00001d036632	MYB-related	0.711537	7.5	8.6	1.14667
Zm00001d018258	MYB-related	0.793973	6	7	1.16667
Zm00001d052750	B3	0.77421	16	19	1.1875
Zm00001d024703	C3H Zinc finger	0.689796	7.4	8.8	1.18919
Zm00001d043131	MYB	0.620022	2.9	3.5	1.2069
Zm00001d015265	HB-PHD	0.754838	4.2	5.1	1.21429
Zm00001d024701	HD-ZIP	0.643272	2.3	2.8	1.21739
Zm00001d039475	MYB-related	0.60561	0.9	1.1	1.22222
Zm00001d014377	ARF	0.826633	43.6	54.3	1.24541
Zm00001d018776	MYB	0.709657	0.8	1	1.25
Zm00001d053298	GeBP	0.637142	4.8	6	1.25
Zm00001d043915	HB-other	0.677213	3.9	4.9	1.25641
Zm00001d041397	WRKY	0.678854	8	10.1	1.2625
Zm00001d053890	SBP	0.71746	2.8	3.6	1.28571
Zm00001d051439	Dof	0.640067	8.1	10.6	1.30864
Zm00001d044481	C3H Zinc finger	0.651486	8.7	11.4	1.31034
Zm00001d020020	G2-like	0.622012	17	22.5	1.32353
Zm00001d052317	LBD	0.645116	0.3	0.4	1.33333
Zm00001d045887	C3H Zinc finger	0.709752	5.1	6.9	1.35294
Zm00001d014286	CAMTA	0.7665	11.5	15.8	1.37391
Zm00001d038811	HB-PHD	0.76084	0.8	1.1	1.375
Zm00001d042313	CAMTA	0.770348	5.9	8.3	1.40678
Zm00001d038812	HB-PHD	0.708363	2.2	3.1	1.40909
Zm00001d041926	bHLH	0.684855	3.1	4.4	1.41935
Zm00001d034730	SBP	0.661001	13.9	20.3	1.46043
Zm00001d046967	NF-YC	0.697621	6.9	10.2	1.47826
Zm00001d026362	MYB-related	0.774583	9	13.4	1.48889
Zm00001d006848	MYB-related	0.727194	0.2	0.3	1.5
Zm00001d042917	Trihelix	0.608456	0.2	0.3	1.5
Zm00001d041831	bZIP	0.726509	12.1	18.3	1.5124
Zm00001d035470	MYB-related	0.75586	11.5	17.6	1.53043
Zm00001d008323	C3H Zinc finger	0.752959	6	9.7	1.61667
Zm00001d043094	NAC	0.693409	0.8	1.3	1.625
Zm00001d012916	SBP	0.7999	4	6.8	1.7
Zm00001d035224	GeBP	0.699027	0.8	1.5	1.875
Zm00001d015243	ARF	0.682281	6.6	12.6	1.90909
Zm00001d026587	C3H Zinc finger	0.642646	6.3	12.2	1.93651
Zm00001d045804	CO-like	0.806125	1.7	3.3	1.94118
Zm00001d048682	GRAS	0.682117	0.1	0.2	2
Zm00001d017986	E2F/DP	0.699291	1	2.1	2.1
Zm00001d050664	E2F/DP	0.699953	1	2.3	2.3
Zm00001d015451	SBP	0.641322	0.2	0.5	2.5
Zm00001d028371	C2H2	0.604211	6.6	18	2.72727
Zm00001d047519	bZIP	0.649058	1.6	4.7	2.9375
Zm00001d037140	HD-ZIP	0.674449	1.2	3.9	3.25
Zm00001d045112	ARR-B	0.621592	1	3.3	3.3
Zm00001d037425	AT-Hook	0.618411	1.7	5.7	3.35294
Zm00001d016737	E2F/DP	0.632417	1	3.4	3.4
Zm00001d049540	NAC	0.655677	12.2	44.4	3.63934
Zm00001d007868	TCP	0.64658	1.3	9.2	7.07692
Zm00001d030995	bZIP	0.640457	3.1	143.3	46.2258
Zm00001d011785	G2-like	0.64339	0.1	6.3	63
Zm00001d002818	TCP	0.619755	0	0	-
Zm00001d007033	ERF	0.643807	0	0	-
Zm00001d008174	bHLH	0.632888	0	0	-
Zm00001d011323	M-type	0.679154	0	0	-
Zm00001d013172	bZIP	0.632888	0	0	-
Zm00001d023287	MYB	0.616876	0	0	-
Zm00001d031225	B3	0.632888	0	0	-
Zm00001d035535	WOX	0.647608	0	0	-
Zm00001d049889	ERF	0.632888	0	0	-
a The genes marked with red color had at least twofold changes in expression after cold stress; The yellow highlighted genes may have binding sites in the promoter region of Zm00001d010720.
b Pearson’s correlation coefficient between transcription factors and Zm00001d010720.
c Expression data are obtained from maize gene expression profile data qTeller, https://qteller.maizegdb.org/.
