# Supplementary material for: Identification of Morphogenesis-Related NDR Kinase Signaling Network and Its Regulation on Cold Tolerance in Maize
Source: Plants (Basel). 2023 Oct 21;12(20):3639. doi: 10.3390/plants12203639 (PMC10610150; doi:10.3390/plants12203639)
Supplement: Supplementary file 1 [file plants-12-03639-s001.zip › Supplementary Table S5.xlsx]

## Sheet: Table S5
Table S5 Expression data for co-expression analysis in this study.
ID	Gene name	B73_6_DAS_GH_Coleoptile	DifferentiationZone_3d	Mz_Ez_3d	B73_R2_Thirteenth_Leaf	B73_V1_4D_PE_Pooled_Leaves	B73_V1_4D_PE_Stem__SAM	V3_Stem_andSAM	B73_V3_Topmost_leaf	B73_V5_Bottom_of_transition_leaf	B73_V5_First_elonagetd_internode	B73_V5_Shoot_tip	V5_Tip_ofStage_2_Leaf	B73_V7_Bottom_of_transition_leaf	B73_V7_Tip_of_transition_leaf	B73_V9_Eighth_Leaf	B73_V9_Eleventh_Leaf	B73_V9_Immature_Leaves	B73_V9_Thirteenth_Leaf	B73_VT_Thirteenth_Leaf	SYMMETRICAL_DIVISION_ZONE	GROWTH_ZONE	MZ	EZ	Vegetative_Meristem_and_surrounding_Tissue
Zm00001d034055	KIC1	11.3	8.4	11.8	3.9	4.3	12.2	12.8	5.3	13.2	14.3	13.8	3.9	14.9	3.7	4.8	3.3	8.1	4.7	4.7	29.4	26.5	16.4	9.1	27.9
Zm00001d051839	TAO3/FRY	6.4	5.4	6	3.9	4.3	7.6	6.4	4.3	8.2	8	9.2	2.4	11.4	3	2.9	4.6	11.5	6.4	4.4	11.2	12.1	6.8	4.5	6.2
Zm00001d027862	MO25	0	0	0	0	0	0	0	0	0	0	0	0	0	0	0	0	0	0	0.1	0	0	0	0	0
Zm00001d006710	MO25	20.6	16.3	11.4	5.5	14.5	16.8	14.9	16.4	25.3	22.4	22.6	14	22.8	18.1	8.1	12.9	10.1	11.1	7.8	27.9	52	8.8	20.3	31.9
Zm00001d021954	MO25	37.6	18.3	18.8	7.4	19.6	29.9	22.4	18.5	37.7	38	41.8	13.6	40.8	26.2	12.2	14	12.1	15.5	8.9	56.2	82.8	28.2	36.8	66.2
Zm00001d007058	MO25	19.5	18.1	21.8	4	6	24.2	25.5	9.2	20.6	27.6	26.4	3.8	31.3	2.4	5.1	4.5	7.7	4.1	5.3	64.1	132.1	14.6	21	51.3
Zm00001d049496	MOB	64.6	49.8	58.5	26.7	36.4	52.8	44.4	36.1	62.6	61.1	51	31.6	55.5	32.3	39.6	33.2	34.4	28.9	39.7	62	141.6	58.1	174.6	88.9
Zm00001d024510	MOB	24.8	35.3	28.1	16	19	21.4	26.5	19.4	19.4	27.4	21.3	18.1	20.7	20.9	18.6	16.3	10.9	18.2	21.3	37.1	49.4	27.7	43.8	44.1
Zm00001d029476	MOB	0.4	0	0	1.7	3.3	0.2	0.1	3.2	1.9	0.1	0.1	1.5	0.6	4.4	1.2	2	1.3	2.8	1.1	0.4	2.6	0.1	0.1	0.5
Zm00001d029478	MOB	1	12.2	11.9	0.3	0.6	1.2	0.5	1.7	1.8	0.2	0.2	0.1	0.6	0.1	1.5	1	5.6	1.1	0.9	0	0.3	0.2	13.4	0.4
Zm00001d051630	MOB	0	0.2	0	0	0.3	0	0	0.3	0	0.1	0	0	0	0.1	0.6	0	0	0	0	0	0	0	0	0
Zm00001d014235	MOB	0	0.4	0.1	0.1	0.5	0.2	0.1	0.6	1	0	0	0.1	0.7	0.2	0.2	0.2	1.3	0.6	0	0	0.3	0	0.1	0
Zm00001d032716	CBK1/NDR	0	0	0	0	0	0	0	0	0	0	0	0	0	0	0	0.1	0	0	0	0	0	0.1	0.2	0.2
Zm00001d039526	CBK1/NDR	29.5	18.3	34.8	6	7.5	24	21.9	10.2	21.7	26.7	31.4	7	20.6	5.7	4.9	7	8.7	8.5	9.4	39.1	45.7	35.4	59.1	40.7
Zm00001d008791	CBK1/NDR	42.9	16.5	45.7	8.4	10.3	34.9	24.1	10.3	29.1	27.4	34.4	8.9	25.9	7.7	6.3	5.7	9.5	6.2	11.7	85.3	76.5	66.2	58.1	58.5
Zm00001d009940	CBK1/NDR	4.8	6.5	3	3.3	2.2	5.5	5.4	1.9	2.3	10.5	11.9	2.6	3.5	1.7	1.9	2.4	2	3.8	3.5	13.8	6.4	7.3	4.1	24.7
Zm00001d031040	CBK1/NDR	9.5	5.6	12.3	1	2.5	7.9	8	3.5	9.2	10.3	10.8	1	8.2	1.6	1.3	2	4.2	3.1	1.3	21	25.1	15.6	14.9	15.8
Zm00001d038672	CBK1/NDR	12.6	11.8	7.9	12.8	11.9	11.8	11.9	14.4	14.3	20.2	15.1	13.8	10.7	12	9	9.2	9.8	11.1	14.4	15.2	17.5	8.8	11.8	19.4
Zm00001d010720	CBK1/NDR	20.8	19	15.7	10.1	12.2	19.2	18.5	17	23.1	26.8	22.9	18	17.6	13.5	8.4	9.6	12.2	9.3	12.8	29.7	39.4	17.1	21.1	21.5
Zm00001d007382	ICE3	0.4	0.9	0.4	0.1	0.1	1.5	1.4	0.4	3.7	0.1	0.5	0	4.8	0	0	1.2	4.7	1.5	0.1	1.6	16.4	0.6	1.4	1.7
Zm00001d009795	CesA1	50.9	59.5	49.3	1	12.5	33.3	40.6	21.5	49.5	58.2	47.4	8	37.9	8.9	3.3	22.8	34.2	25.9	1.8	24.6	58	18.8	57.2	18.1
Zm00001d014658	MPK8	20	29.9	9.5	21.9	6.1	14.4	14.3	5.3	12.2	24.4	20.8	4.3	16.1	4.7	12.3	13.3	16.9	13.9	15.9	19.4	20.1	17.2	24.1	36.1
Zm00001d015743	bZIP61	2.2	0.6	0.3	45.7	31.9	0.2	0.2	56	1.1	0.4	0.7	56.6	0.6	53.1	38.4	14.4	3.2	6.8	31.4	0.8	1.9	4.9	2.4	0.5
Zm00001d024807	MPK6	15.9	9.4	16.7	23.9	16.7	15.7	15.8	14.8	17.2	19.4	16.9	10.2	17.6	12.3	12.7	9.2	11.6	9.2	32.5	30.1	37.8	24.7	27.4	35.9
Zm00001d026239	COLD1	6.7	7.1	7.9	3.9	2.6	5.6	7	3.4	8.1	8.8	7.6	3	7.5	3	3.4	4.4	7.6	5.7	3.4	16.4	15.8	10.7	12.5	15.5
Zm00001d034553	CesA4	29.3	11.1	7.3	2.2	14.7	31.5	32.6	17.4	38.7	39.1	50	8	49.4	3.1	2.3	15.4	24.4	17.5	2.5	52.9	85.3	6.7	4	49
Zm00001d034770	CesA5	51.9	64.8	53.2	9.2	49.5	61.6	62.2	68.3	154	71.7	59.7	32.4	131.4	27	14	54.3	167.2	82.7	12.2	48.2	224.1	25.6	50.9	41.1
Zm00001d046402	bZIP80	0	0.1	0	31.9	7.3	0	0	15	0.1	0.1	0	23.3	0	25.3	18.7	0.7	0	0.3	21.6	0	0	0	0	0.1
Zm00001d049294	ICE2	5	0.3	1.2	0.7	0.3	4.5	3	0.8	10.3	0.6	2	0.2	14.4	0.5	0.4	1.1	11.3	2	0.7	13.2	73.8	0.3	3	10.1
Zm00001d050018	bZIP68	5.3	3.1	2.4	5.2	0.5	3.4	4.2	1.6	5.8	11.6	6.3	1	3.8	1.2	1.7	2.5	7.1	4.5	4.1	7.9	10.9	6.7	6.9	7.1
Zm00001d042263	ICE1	2.7	0.1	0	3.9	1.1	3.7	2.5	1.1	3.7	1.9	1.3	2.2	2.8	0.8	2.2	4.5	6.4	5.3	3.1	14.6	13.1	1	0.1	3.8
