# Supplementary material for: Identification of Morphogenesis-Related NDR Kinase Signaling Network and Its Regulation on Cold Tolerance in Maize
Source: Plants (Basel). 2023 Oct 21;12(20):3639. doi: 10.3390/plants12203639 (PMC10610150; doi:10.3390/plants12203639)
Supplement: Supplementary file 1 [file plants-12-03639-s001.zip › Supplementary Table S6.xlsx]

## Sheet: Table S6
Table S6 Primers used in this study.
Experimental purpose	Gene name	Gene ID	Forward (5'-3')	Reverse (5'-3')
Expression Analysis	KIC1	Zm00001d034055	CGTTTGGGCATTAGGTGTATCTG	GCTGGTTCACTAGATATCATGAAGATAA
	TAO3/FRY	Zm00001d051839	TGCACAACATCAGGTCCTTACAT	GTGCTCCAAAGTTTCTCAATCTCAT
	MO25	Zm00001d006710	GAGACGCTGACAGGCAGGATAAG	GCCCGTGAATACGTGATGGAA
	MOB	Zm00001d049496	ATATGCTGTATGGCACGCTCAC	TGGTGCTGATACCTCTATGGGTT
	CBK1	Zm00001d010720	TACCACTTGGTTAAGCAACCCTT	CCATTCCATATCCCTTCTTCAGTA
	GAPDH	Zm00001d049641	CATCACCACGGACTACAT	GACTCCACGACATACTCA
Genotype detection of mutant zm00001d010720	CBK1	Zm00001d010720	AGAACTGGGAACCATCTTCTGTC	ATCTCTATGTTCTTGTTGTCAGGGA
